# Supplementary material for: Mime-seq 2.0: a method to sequence microRNAs from specific mouse cell types
Source: PubMed Central journal article supplement (PMC11183118; doi:10.1038/s44318-024-00102-8), 2024-04-30
Supplement: 44318_2024_102_MOESM1_ESM.pdf [file 44318_2024_102_MOESM1_ESM.pdf]

## Appendix

|                                                                                                 |          |
|-------------------------------------------------------------------------------------------------|----------|
| <i>Appendix Fig. S1 – Processing details for small RNA libraries. ....</i>                      | <i>2</i> |
| <i>Appendix Fig. S2 - Filter statistics - small RNA pipeline example B cell libraries. ....</i> | <i>3</i> |

**A** Structure small RNA ligated to 3' and 5' linker

5'-ACACUCUUUCCCUACACGACGCUCUCCGAUCUNNNN-(sRNA)<sub>18-30nt</sub>-NNNNNNXXXXXAGATCGGAAGAGCACACGTCTTddC-3'

**B**

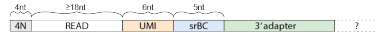

**C**

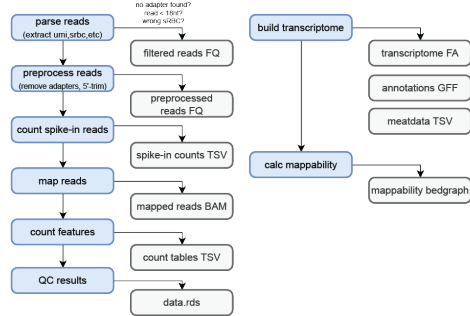

**Appendix Fig. S1 – Processing details for small RNA libraries.**

**A.** Structure of small RNA ligated to 3' and 5' linkers. Ns indicate random nucleotides as part of the linkers to counteract ligation bias. XXXXX indicates position of 3' srBC barcode.

**B.** Outline of sequencing read structure.

**C.** Block diagram providing brief overview of analysis pipeline stages.

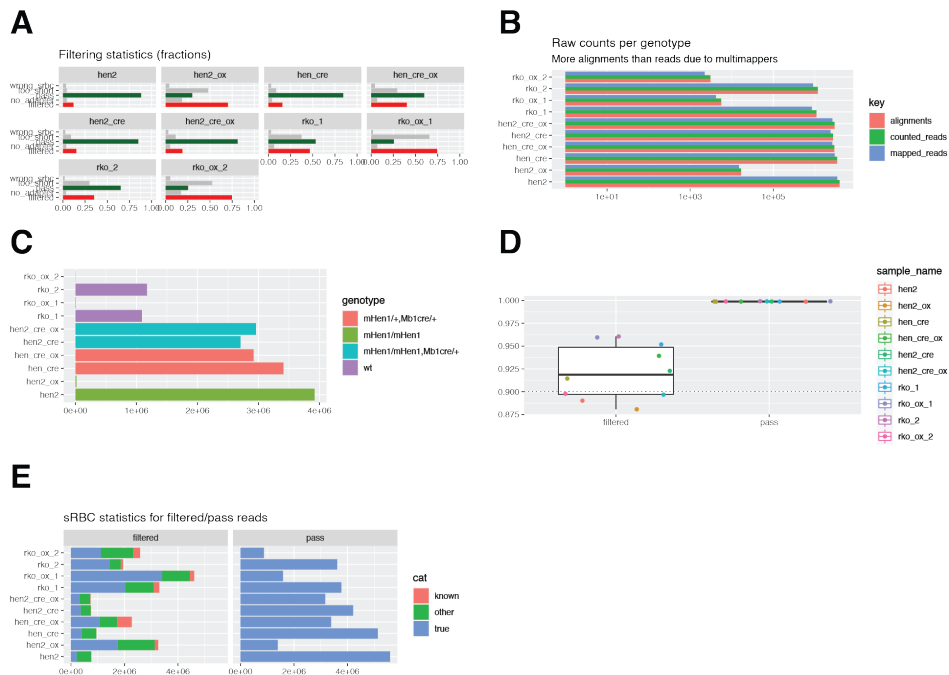

**Appendix Fig. S2 - Filter statistics - small RNA pipeline example B cell libraries.**

**A-E** For each genotype oxidized and unoxidized sample is shown.

**A.** Fraction of reads per sample that passed (green) or failed (red) the filtering criteria. Gray bars indicate fractions of filter reasons.

**B.** Number of mapped/counted reads/alignments per sample. X-axis is logarithmic.

**C.** Mapped read counts per sample, colored by genotype.

**D.** Mean adapter alignment scores for reads that passed/failed the filtering criteria; dashed line indicates the configured minimum alignment score threshold.

**E.** Numbers of found srBC sequences for filtered/passed reads. 'True': found srBC matches expected one; 'Known': found srBC matches one expected for another sample; 'other': found srBC matches unknown sequence. High numbers of 'known' srBC sequences could reveal sample mix-ups or cross-sample contamination.
